# Supplementary material for: EBV(LMP1)-induced metabolic reprogramming inhibits necroptosis through the hypermethylation of the RIP3 promoter
Source: PubMed Central journal article supplement — Theranostics. 2019 Apr 13;9(9):2424–38. doi: 10.7150/thno.30941 (PMC6525991; doi:10.7150/thno.30941), 2019-04-13
Supplement: thnov09p2424s1.pdf [file thnov09p2424s1.pdf]

# Supplementary Tables

**Table S1 Relationship between *RIP3* promoter methylation and clinico-pathological parameters**

| Parameter               | <i>RIP3</i> promoter methylation | <i>P</i> value |
|-------------------------|----------------------------------|----------------|
| Age at diagnosis (year) |                                  |                |
| ≥ 61                    | 143/262 (54.6%)                  | 0.352          |
| < 61                    | 116/257 (45.1%)                  |                |
| Sex                     |                                  |                |
| Female                  | 69/139 (49.6%)                   | 0.963          |
| Male                    | 190/381 (49.9%)                  |                |
| Histology grade         |                                  |                |
| G1                      | 28/62 (45.2%)                    | 0.556          |
| G2                      | 157/304 (51.6%)                  |                |
| G3/G4                   | 63/132 (47.7%)                   |                |
| pT                      |                                  |                |
| T1                      | 18/35 (51.4%)                    | 0.881          |
| T2                      | 75/151 (49.7%)                   |                |
| T3                      | 71/135 (52.6%)                   |                |
| T4                      | 88/183 (48.1%)                   |                |
| pN                      |                                  |                |
| N0                      | 81/176 (46.0%)                   | 0.597          |
| N1                      | 33/67 (49.3%)                    |                |
| N2/N3                   | 91/177 (51.4%)                   |                |
| Stage                   |                                  |                |
| I                       | 12/20 (60.0%)                    | 0.251          |
| II                      | 46/98 (46.9%)                    |                |
| III                     | 60/105 (57.1%)                   |                |
| IV                      | 134/283 (47.3%)                  |                |

G1, well differentiated; G2, moderately differentiated; G3, poorly differentiated; G4, Undifferentiated; pT, pathologic T stage; pN, lymph node metastases.

**Table S2    Survival analysis according to *RIP3* mRNA expression**

| <i>RIP3</i> mRNA expression | N          | Disease-free survival time (months) |               | Overall survival time (months) |                |
|-----------------------------|------------|-------------------------------------|---------------|--------------------------------|----------------|
|                             |            | average                             | median        | average                        | median         |
| positive                    | 211        | 91.779                              | 71.220        | 109.944                        | 108.870        |
| negative                    | 181        | 71.135                              | 53.090        | 82.109                         | *              |
| <b>Total</b>                | <b>392</b> | <b>90.414</b>                       | <b>67.740</b> | <b>105.124</b>                 | <b>108.870</b> |

\* The cumulative probability of survival > 50%.

**Table S3    Survival analysis according to *RIP3* promoter methylation**

| <i>RIP3</i> promoter methylation | N          | Disease-free survival time (months) |               | Overall survival time (months) |                |
|----------------------------------|------------|-------------------------------------|---------------|--------------------------------|----------------|
|                                  |            | average                             | median        | average                        | median         |
| unmethylated                     | 189        | 106.129                             | *             | 111.327                        | 108.870        |
| methylated                       | 203        | 76.223                              | 49.970        | 98.684                         | 69.650         |
| <b>Total</b>                     | <b>392</b> | <b>90.414</b>                       | <b>67.740</b> | <b>105.124</b>                 | <b>108.870</b> |

\* The cumulative probability of survival > 50%.

## Supplementary Figures

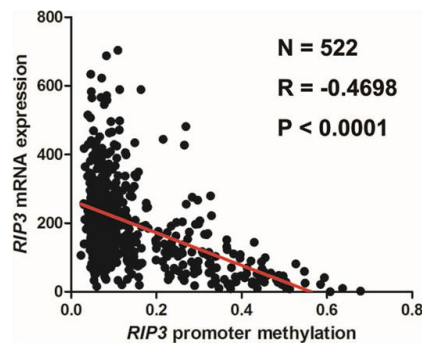

**Figure S1.** There is a significantly negative correlation between *RIP3* mRNA expression and its promoter methylation in HNSCC tissues (data from TCGA Research Network).

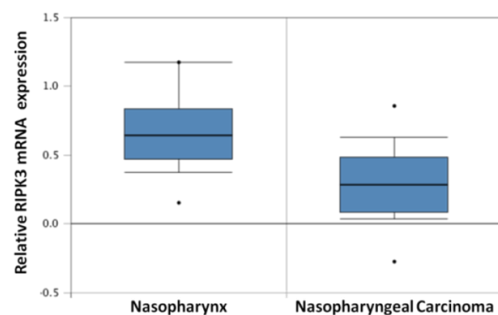

**Figure S2.** *RIP3* mRNA expression is down-regulated in NPC ( $P < 0.001$ ) (data from Oncomine database [1])

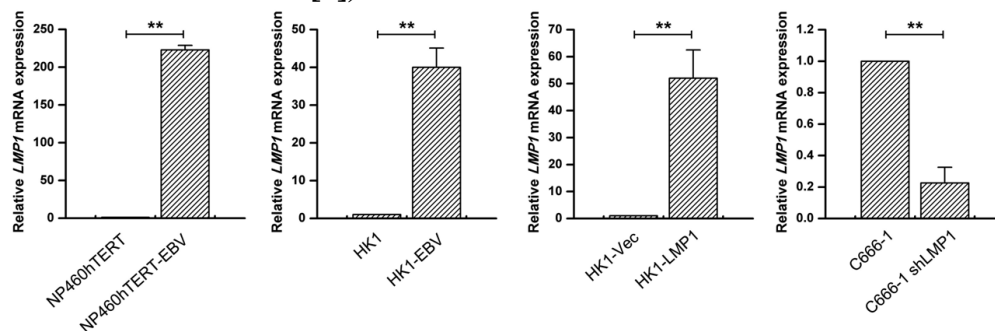

**Figure S3.** *LMP1* mRNA expression in cell lines determined by realtime PCR.

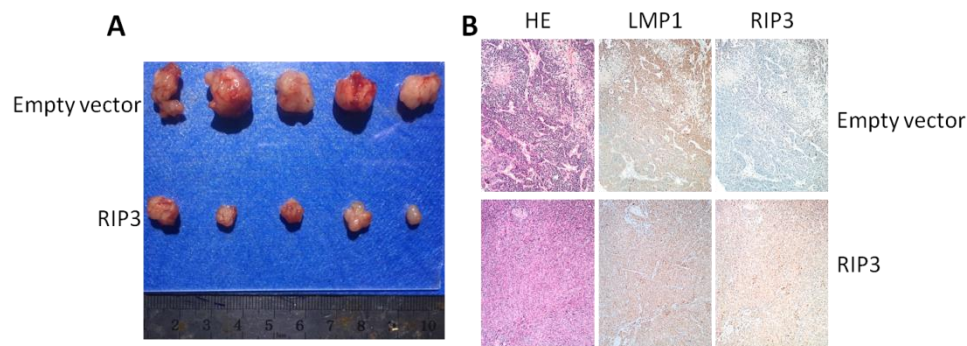

**Figure S4.** Restoring *RIP3* expression in EBV(LMP1)-positive cells inhibits xenograft tumor growth in nude mice. A, representative images of xenograft tumors; B, representative images of HE staining and LMP1/ *RIP3* staining by immunohistochemistry in xenograft tumor sections (100 $\times$ ).

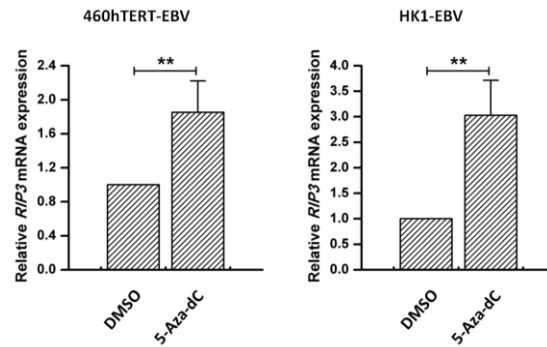

**Figure S5. *RIP3* mRNA re-expressed with 5-aza-dC treatment**

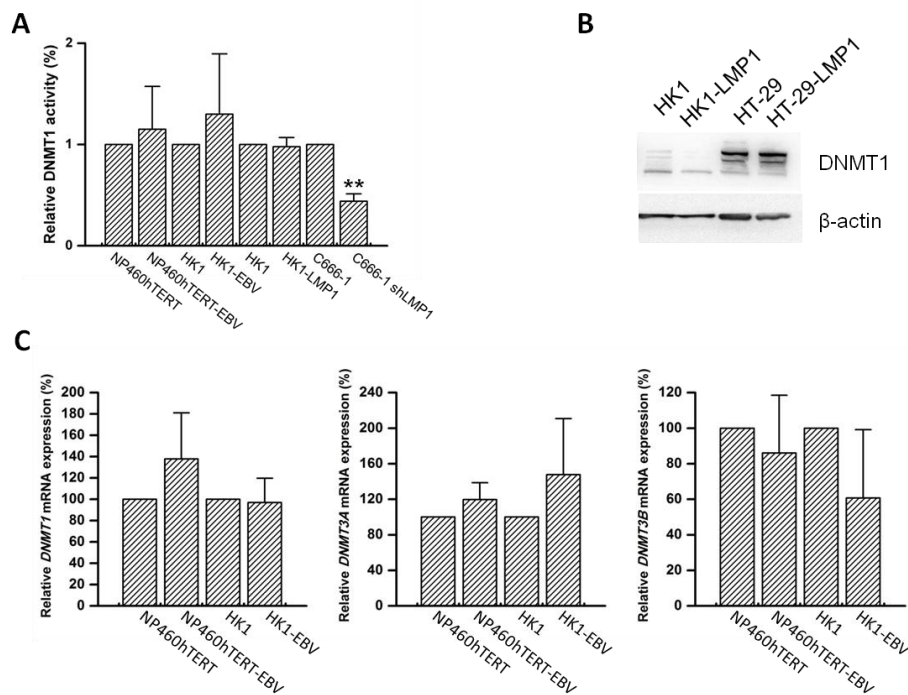

**Figure S6. DNMTs enzymatic activity and expression were not affected by EBV(LMP1).**

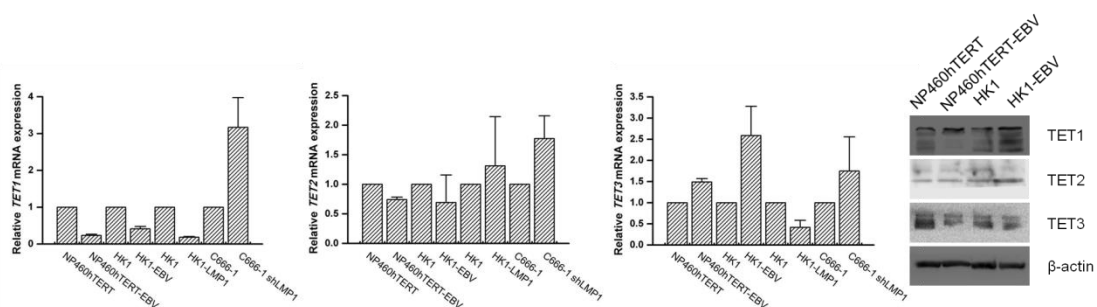

**Figure S7. The expression of TETs was not affected by EBV(LMP1).**

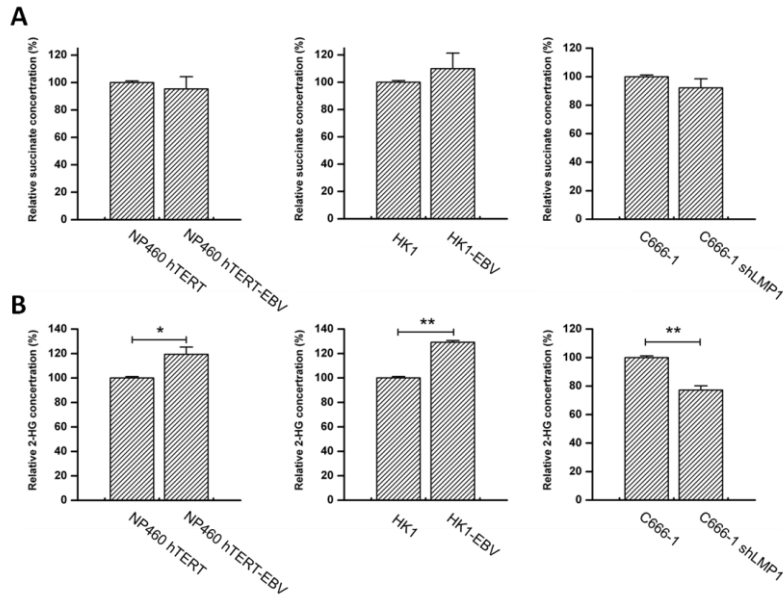

**Figure S8.** The cellular levels of succinate and 2-HG were confirmed by specific kits in three pairs of cell lines.

Altered in 0 (0%) of 56 sequenced cases/patients (56 total)

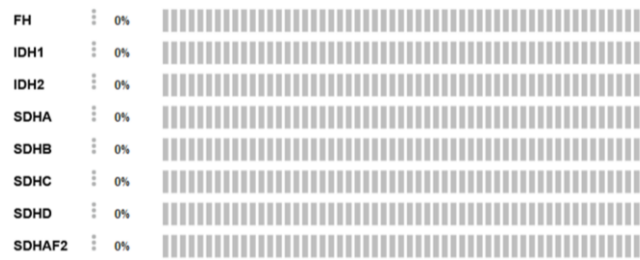

**Figure S9.** No mutation of indicated genes was found in 56 NPC tissues (data from cBioPortal for Cancer Genomics [2]).

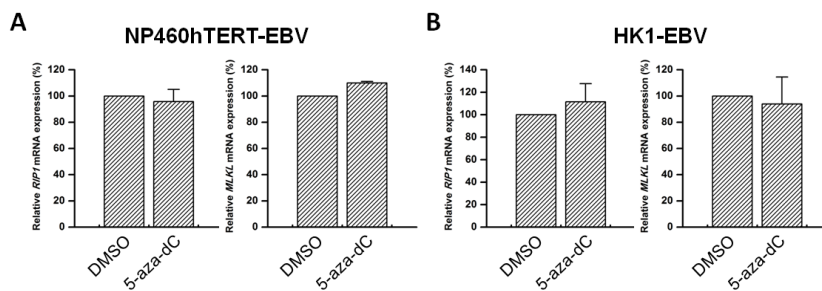

**Figure S10.** *RIP1* and *MLKL* mRNA were not affected by 5-aza-dC treatment.

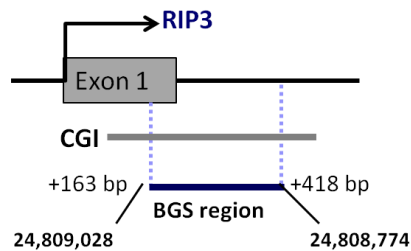

**Figure S11.** Structure of the *RIP3* promoter CpG island (CGI).

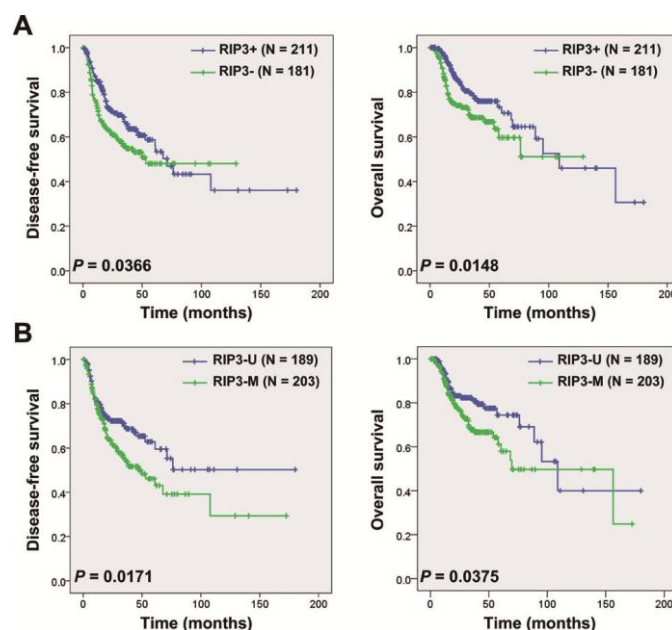

**Figure S12. Kaplan–Meier analysis according to *RIP3* promoter methylation and mRNA expression status in 392 HNSCC patients with both DFS and OS information.**

A, Disease-free survival (left) and overall survival (right) analysis according to *RIP3* mRNA expression. HNSCC patients were divided into two groups: good prognosis (positive expression of *RIP3* mRNA) and poor prognosis (negative expression of *RIP3* mRNA; “-”, negative; “+”, positive).

B, Disease-free survival (left) and overall survival (right) analysis according to *RIP3* promoter methylation. HNSCC patients were divided into two groups: good prognosis (unmethylated *RIP3* promoter) and poor prognosis (methylated *RIP3* promoter). U, unmethylated; M, methylated.

## References

1. Sengupta S, den Boon JA, Chen IH, Newton MA, Dahl DB, Chen M, et al. Genome-wide expression profiling reveals EBV-associated inhibition of MHC class I expression in nasopharyngeal carcinoma. *Cancer Res.* 2006; 66: 7999-8006.
2. Lin DC, Meng X, Hazawa M, Nagata Y, Varela AM, Xu L, et al. The genomic landscape of nasopharyngeal carcinoma. *Nat Genet.* 2014; 46: 866-71.
